Abstract

# MED3/343: Networked Learner Support in Continuing Medical Education

L Fox; E Dolman; D Hornby; P Lane; A O'Rourke; C Roberts; T Roscoe

University of Sheffield Community Sciences Centre, Sheffield, UK

## Abstract

**Introduction:** This paper reports data from the second year of the WISDOM research project. This project has established a framework for the delivery of continuing medical education and professional development using information and communication technologies, with a particular focus on networked professional development (NPD) for clinical governance.

**Methods:** An action research project.

**Results:** The association of a web site providing resource materials (tutorials, electronic links and other information) with networking technologies, such as e-mail discussion groups and newsgroups, has been demonstrated to be effective in delivering curricula in informatics, evidence-based practice and reflective practice. The virtual classroom may be adapted to serve a number of objectives, and can be adapted to operate as a virtual conference and as a mechanism for research data collection methods, such as the Delphi methodology. The project's findings indicate that there is a need for a coherent policy of networked learner support (NLS) in such virtual classrooms. NLS includes:

- support on the development of adult-learning and reflection skills in participants
- active facilitation of learning within an adult-learning model
- mechanisms for assessment which reflect adult learning approaches (for example, a portfolio approach or personal learning plan)
- a mechanism for mentoring participants to enable them to achieve their learning objectives

**Conclusion:** It is argued that NPD and NLS must be further researched if information and communication technologies are to be fully exploited as delivery mechanisms in professional development.

(*J Med Internet Res* 1999;1(suppl1):e46) doi: [10.2196/jmir.1.suppl1.e46](https://doi.org/10.2196/jmir.1.suppl1.e46)

## KEYWORDS

Education, Medical, Graduate; Information technology; Networked Professional Development; Networked Learner Support

###Reviewer names will be inserted here### published 19.09.99.

*Please cite as:*

Fox L, Dolman E, Hornby D, Lane P, O'Rourke A, Roberts C, Roscoe T  
MED3/343: Networked Learner Support in Continuing Medical Education  
*J Med Internet Res* 1999;1(suppl1):e46  
URL: <http://www.jmir.org/1999/suppl1/e46/>  
doi: [10.2196/jmir.1.suppl1.e46](https://doi.org/10.2196/jmir.1.suppl1.e46)  
PMID:

Except where otherwise noted, articles published in the Journal of Medical Internet Research are distributed under the terms of the Creative Commons Attribution License (<http://www.creativecommons.org/licenses/by/2.0/>), which permits unrestricted use, distribution, and reproduction in any medium, provided the original work is properly cited.
